# Supplementary material
Source: publisher figshare collection journal article supplement (https://acs.figshare.com/ndownloader/files/34193309)
Supplement: Supplementary file 1 [file 34193309]

## Supporting Information for

# Amplification of the Specific Conformational Fluctuation of Proteins by Site-specific Mutagenesis and Hydrostatic Pressure

*Takuro Wakamoto<sup>a,†</sup>, Junya Yamamoto<sup>b,‡</sup>, Sho Senzaki<sup>c,§</sup>, Reina Koide<sup>c</sup>, Soichiro Kitazawa<sup>c</sup>, and Ryo Kitahara<sup>b,c,\*</sup>*

<sup>a</sup>Graduate School of Life Sciences, Ritsumeikan University, 1-1-1 Nojihigashi, Kusatsu, Shiga 525-8577, Japan

<sup>b</sup>Graduate School of Pharmaceutical Sciences, Ritsumeikan University, 1-1-1 Nojihigashi, Kusatsu, Shiga 525-8577, Japan

<sup>c</sup>College of Pharmaceutical Sciences, Ritsumeikan University, 1-1-1 Nojihigashi, Kusatsu, Shiga 525-8577, Japan

\*Email: [ryo@ph.ritsumei.ac.jp](mailto:ryo@ph.ritsumei.ac.jp)

Contents: Figures S1, S2, and S3

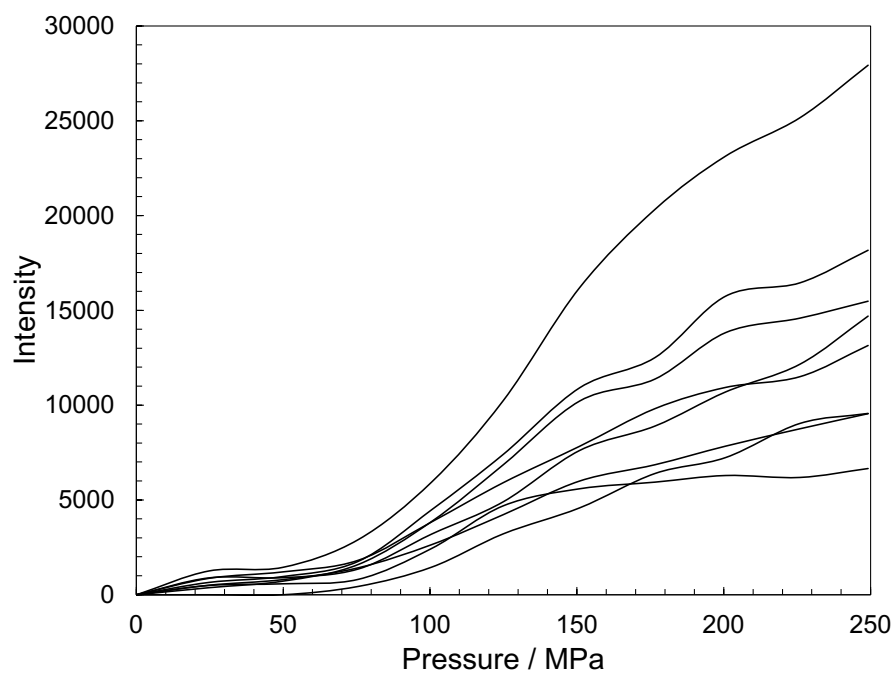

Figure S1. Peak intensities (volumes) of new cross-peaks at different pressures. Eight peaks were selected from dozens of new cross-peaks. The estimation of peak volumes of other new cross-peaks was uncertain due to the peak overlap.

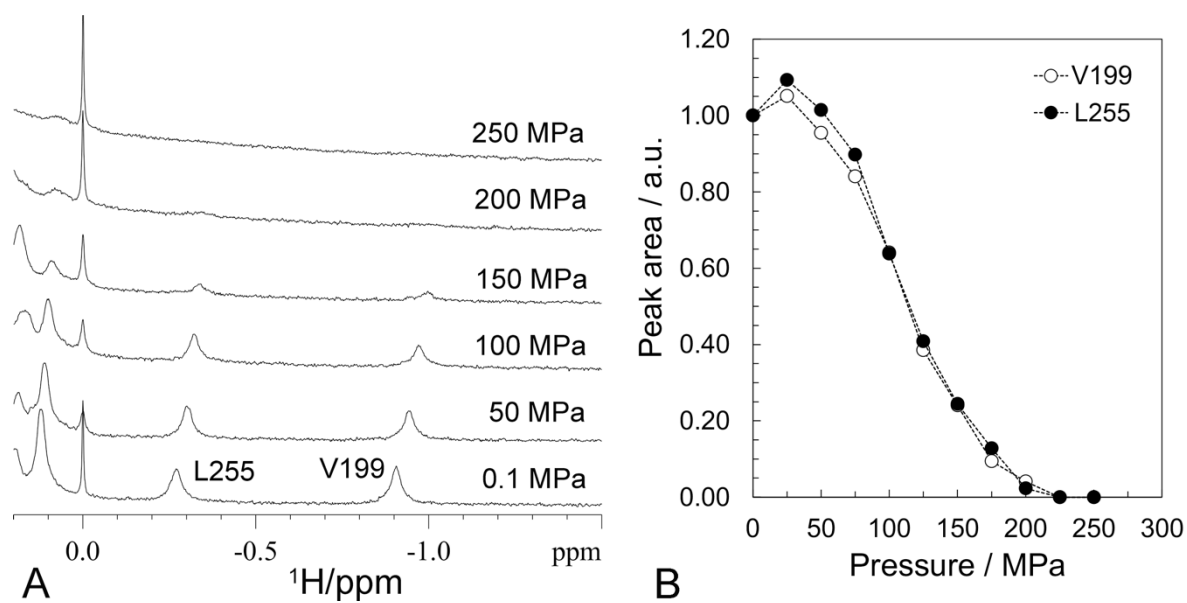

Figure S2. Pressure-induced denaturation of the OspA E160D mutant. (A) Expanded view of the  $^1\text{H}$  one-dimensional NMR spectra of the protein at pressures ranging from 0.1 MPa to 250 MPa. (B) Pressure-induced changes in peak intensities of the methyl groups (-0.28 ppm and -0.91 ppm). The peaks at -0.28 and -0.91 ppm were assigned to methyl protons of L255 and (closed circles) and V199 (open circles), respectively.

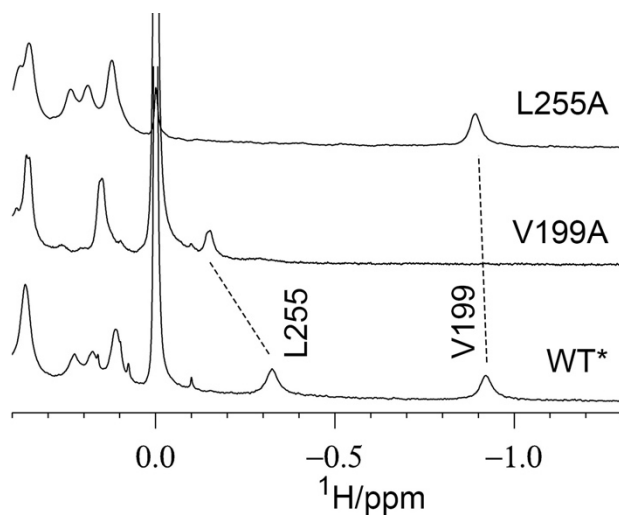

Figure S3. NMR signal assignments of two methyl peaks of OspA WT\*.  $^1\text{H}$  NMR spectra are compared among WT\*, V199A mutant, and L255A mutant proteins.
